# Supplementary material for: A Comprehensive Analysis of the Impact of HIV on HCV Immune Responses and Its Association with Liver Disease Progression in a Unique Plasma Donor Cohort
Source: PubMed Central journal article supplement (PMC4959707; doi:10.1371/journal.pone.0158037), 2016-07-25
Supplement: pone.0158037.s001.pdf [file pone.0158037.s001.pdf]

**S1 Table:** HCV peptide pool design

| Peptides pool | Number of peptides |
|---------------|--------------------|
| core          | 28                 |
| NS2           | 32                 |
| NS3-1         | 50                 |
| NS3-2         | 48                 |
| NS4A          | 7                  |
| NS4B          | 40                 |
| NS5A-1        | 35                 |
| NS5A-2        | 36                 |
| NS5B-1        | 45                 |
| NS5B-2        | 45                 |
| E1            | 28                 |
| E2-1          | 30                 |
| E2-2          | 25                 |
| p7            | 8                  |
| ARFP          | 22                 |
| TOTAL         | 479                |
