# Supplementary material for: A Comprehensive Analysis of the Impact of HIV on HCV Immune Responses and Its Association with Liver Disease Progression in a Unique Plasma Donor Cohort
Source: PubMed Central journal article supplement (PMC4959707; doi:10.1371/journal.pone.0158037), 2016-07-25

**S2 Fig.:** Gating strategy of sorted short term T cell lines

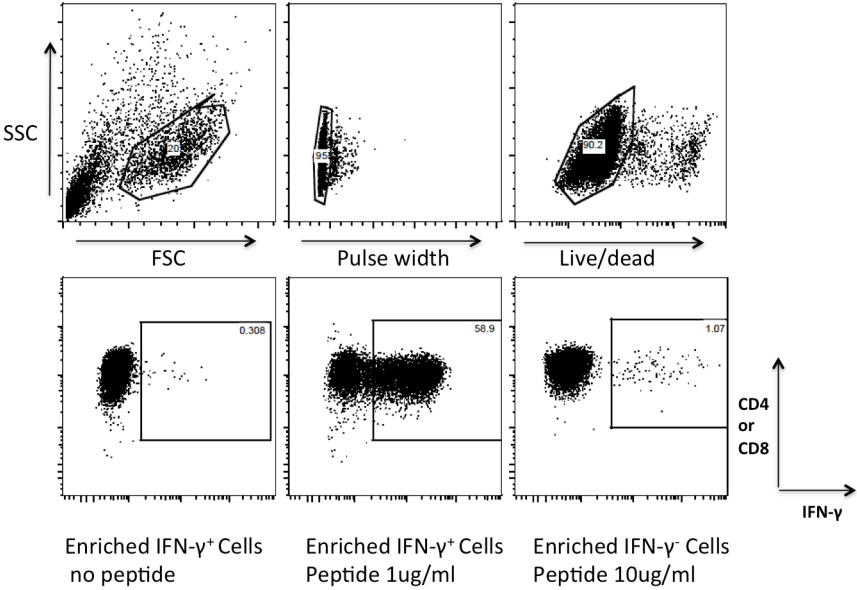

Supplement: pone.0158037.s003.pdf [file pone.0158037.s003.pdf]
