# Supplementary material for: A Comprehensive Analysis of the Impact of HIV on HCV Immune Responses and Its Association with Liver Disease Progression in a Unique Plasma Donor Cohort
Source: PubMed Central journal article supplement (PMC4959707; doi:10.1371/journal.pone.0158037), 2016-07-25

**S4 Fig.:** Representative data of IFN $\gamma$  ELISPOT responses from a HCV mono-infected patient and a HIV/HCV co-infected patient

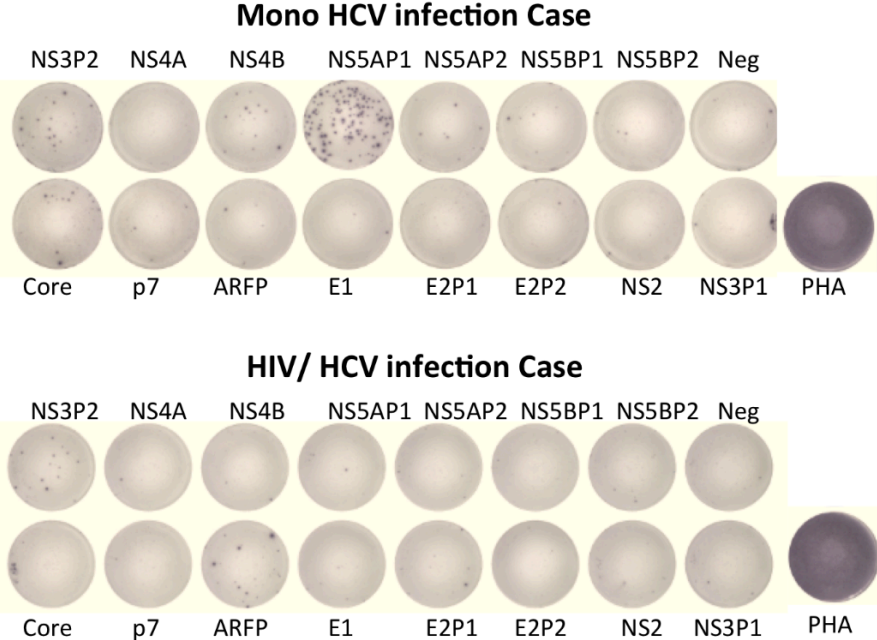

Supplement: pone.0158037.s005.pdf [file pone.0158037.s005.pdf]
