# Supplementary material for: A Comprehensive Analysis of the Impact of HIV on HCV Immune Responses and Its Association with Liver Disease Progression in a Unique Plasma Donor Cohort
Source: PubMed Central journal article supplement (PMC4959707; doi:10.1371/journal.pone.0158037), 2016-07-25

**S6 Fig.:** The CD4+T cell count was significantly lower in HIV/HCV co-infection group compared to mono HCV infection group. Data represent mean+ SD,  $p$  as calculated by Mann Whitney test.

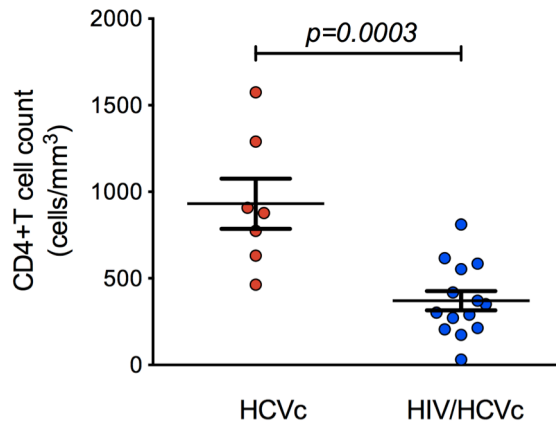

Supplement: pone.0158037.s007.pdf [file pone.0158037.s007.pdf]
